# Supplementary material for: Female In-Class Participation and Performance Increase with More Female Peers and/or a Female Instructor in Life Sciences Courses
Source: Atypon-hosted journal article supplement (doi:10.1187/cbe.19-12-0266), 2020-07-14
Supplement: combinedsupmats.pdf [file combinedsupmats.pdf]

# Supplemental Material

*CBE—Life Sciences Education*

Bailey *et al.*

**Table S1. Selection of random effects to predict gender gaps in verbal participation.**

| Rank | Model <sup>a</sup>           | Converged? | AICc   | $\Delta i$ | Best Model <sup>b</sup> |
|------|------------------------------|------------|--------|------------|-------------------------|
| 1    | (1 Classroom)                | Yes        | 167.98 | 0          | *                       |
| 2    | (1 Classroom) + (1 Semester) | No         | 170.04 | 2.06       |                         |
| 3    | No random effects            | Yes        | 170.86 | 2.88       |                         |
| 4    | (1 Semester)                 | Yes        | 172.87 | 4.89       |                         |

<sup>a</sup> Although not shown, models include all fixed effects of interest: Class.Size + Upper.Level + Fem.Inst + Perc.Fem

<sup>b</sup> As described in Methods, if models were within 2 AICc, the model with the fewest number of parameters was chosen as the best model.

**Table S2. Selection of fixed effects to predict gender gaps in verbal participation.**

| Rank | Model <sup>a</sup>                             | AICc   | $\Delta i$ | $\omega_i$ | Best Model <sup>b</sup> |
|------|------------------------------------------------|--------|------------|------------|-------------------------|
| 1    | Perc.Fem                                       | 154.64 | 0          | 0.28       | *                       |
| 2    | Perc.Fem + Upper.Level                         | 156.39 | 1.75       | 0.12       |                         |
| 3    | Perc.Fem + Class.Size                          | 156.69 | 2.06       | 0.10       |                         |
| 4    | Perc.Fem + Fem.Inst                            | 156.86 | 2.22       | 0.09       |                         |
| 5    | No fixed effects                               | 157.08 | 2.44       | 0.08       |                         |
| 6    | Perc.Fem + Upper.Level + Class.Size            | 157.75 | 3.11       | 0.06       |                         |
| 7    | Upper.Level                                    | 158.37 | 3.73       | 0.04       |                         |
| 8    | Perc.Fem + Upper.Level + Fem.Inst              | 158.65 | 4.01       | 0.04       |                         |
| 9    | Upper.Level + Class.Size                       | 158.73 | 4.09       | 0.04       |                         |
| 10   | Class.Size                                     | 158.85 | 4.21       | 0.03       |                         |
| 11   | Perc.Fem + Class.Size + Fem.Inst               | 158.95 | 4.32       | 0.03       |                         |
| 12   | Fem.Inst                                       | 159.19 | 4.55       | 0.03       |                         |
| 13   | Perc.Fem + Upper.Level + Class.Size + Fem.Inst | 160.05 | 5.41       | 0.02       |                         |
| 14   | Upper.Level + Fem.Inst                         | 160.48 | 5.84       | 0.02       |                         |
| 15   | Upper.Level + Class.Size + Fem.Inst            | 160.99 | 6.35       | 0.01       |                         |
| 16   | Class. Size + Fem.Inst                         | 161.05 | 6.41       | 0.01       |                         |

<sup>a</sup> Class.Size = # students attending class, Upper.Level = 300- or 400- level class, Fem.Inst = female instructor, Perc.Fem = % females in attendance. Although not shown, all models also include a random effect to allow for a random intercept for each class: (1|Classroom)

<sup>b</sup> As described in Methods, if models were within 2 AICc, the model with the fewest number of parameters was chosen as the best model.

**Table S3. Selection of random effects to predict gender gaps in verbal participation (controllable variables).**

| Rank | Model <sup>a</sup>           | Converged? | AICc   | $\Delta i$ | Best Model <sup>b</sup> |
|------|------------------------------|------------|--------|------------|-------------------------|
| 1    | (1 Classroom)                | Yes        | 166.15 | 0          | *                       |
| 2    | (1 Classroom) + (1 Semester) | No         | 168.09 | 1.94       |                         |
| 3    | no random effects            | Yes        | 169.65 | 3.50       |                         |
| 4    | (1 Semester)                 | No         | 171.72 | 5.57       |                         |

<sup>a</sup> Although not shown, models include all fixed effects of interest: Part.Req + Instructor.Ques + Group.Work + Ov.Call.Rate

<sup>b</sup> As described in Methods, if models were within 2 AICc, the model with the fewest number of parameters was chosen as the best model.

**Table S4. Selection of fixed effects to predict gender gaps in verbal participation (controllable variables).**

| Rank | Model <sup>a</sup>                                     | AICc   | $\Delta i$ | $\omega_i$ | Best Model <sup>b</sup> |
|------|--------------------------------------------------------|--------|------------|------------|-------------------------|
| 1    | Ov.Call.Rate                                           | 152.44 | 0.00       | 0.24       | *                       |
| 2    | Ov.Call.Rate + Group.Work                              | 152.80 | 0.37       | 0.20       |                         |
| 3    | Ov.Call.Rate + Group.Work + Instructor.Ques            | 153.62 | 1.18       | 0.13       |                         |
| 4    | Ov.Call.Rate + Instructor.Ques                         | 153.97 | 1.53       | 0.11       |                         |
| 5    | Ov.Call.Rate + Part.Req                                | 154.35 | 1.91       | 0.09       |                         |
| 6    | Ov.Call.Rate + Group.Work + Part.Req                   | 155.04 | 2.60       | 0.07       |                         |
| 7    | Ov.Call.Rate + Instructor.Ques + Part.Req              | 155.76 | 3.33       | 0.05       |                         |
| 8    | Ov.Call.Rate + Group.Work + Instructor.Ques + Part.Req | 155.85 | 3.41       | 0.04       |                         |
| 9    | No fixed effects                                       | 157.08 | 4.64       | 0.02       |                         |
| 10   | Instructor.Ques                                        | 158.30 | 5.86       | 0.01       |                         |
| 11   | Group.Work                                             | 158.81 | 6.37       | 0.01       |                         |
| 12   | Part.Req                                               | 159.04 | 6.60       | 0.01       |                         |
| 13   | Group.Work + Instructor.Ques                           | 159.66 | 7.22       | 0.01       |                         |
| 14   | Instructor.Ques + Part.Req                             | 160.15 | 7.71       | 0.01       |                         |
| 15   | Group.Work + Part.Req                                  | 160.95 | 8.51       | 0.00       |                         |
| 16   | Group.Work + Instructor.Ques + Part.Req                | 161.78 | 9.34       | 0.00       |                         |

<sup>a</sup> Ov.Call.Rate = overall call rate (average # hands called on/# hands raised per student), Instructor.Ques = # questions posed by instructor to the class, Part.Req = degree to which classroom participation is required in students' grades (see Methods), Group.Work = # of times students worked in pairs or groups. Although not shown, all models also include a random effect to allow for a random intercept for each class: (1|Classroom)

<sup>b</sup> As described in Methods, if models were within 2 AICc, the model with the fewest number of parameters was chosen as the best model.

**Table S5. Results of stepwise multiple linear regression with performance gap as target (including Instructor F8).**

| Model | R <sup>2</sup> | Adjusted R <sup>2</sup> | Significance (change in R <sup>2</sup> ) | Variable                     | B (coefficient) | SE <sub>B</sub> | $\beta$ (standardized coefficient) | p value |
|-------|----------------|-------------------------|------------------------------------------|------------------------------|-----------------|-----------------|------------------------------------|---------|
| 1     | 0.228          | 0.202                   | 0.007                                    | (Intercept)                  | -0.435          | 0.129           |                                    | 0.002   |
|       |                |                         |                                          | Percent female in attendance | 0.821           | 0.280           | 0.478                              | 0.007   |
| 2     | 0.379          | 0.334                   | 0.015                                    | (Intercept)                  | -0.473          | 0.119           |                                    | <0.0001 |
|       |                |                         |                                          | Female Instructor            | 0.200           | 0.077           | 0.394                              | 0.015   |
|       |                |                         |                                          | Percent female in attendance | 0.700           | 0.260           | 0.408                              | 0.012   |

**Table S6. Results of multiple linear regression to predict male and female performance separately**

| Target            | R <sup>2</sup> | Adjusted R <sup>2</sup> | Significance (change in R <sup>2</sup> ) | Variable                     | B (coefficient) | SE <sub>B</sub> | β (standardized coefficient) | p value |
|-------------------|----------------|-------------------------|------------------------------------------|------------------------------|-----------------|-----------------|------------------------------|---------|
| Avg. Female Grade | 0.295          | 0.242                   | 0.009                                    | (Intercept)                  | 2.754           | 0.167           |                              | <0.0001 |
|                   |                |                         |                                          | Female Instructor            | 0.231           | 0.110           | 0.345                        | 0.045   |
|                   |                |                         |                                          | Percent female in attendance | 0.818           | 0.366           | 0.366                        | 0.034   |
| Avg. Male Grade   | 0.003          | -0.070                  | 0.955                                    | (Intercept)                  | 3.248           | 0.140           |                              | <0.0001 |
|                   |                |                         |                                          | Female Instructor            | -0.022          | 0.092           | -0.047                       | 0.811   |
|                   |                |                         |                                          | Percent female in attendance | 0.067           | 0.306           | 0.043                        | 0.828   |

**Table S7. Selection of random effects to predict student performance (course grade z-scores).**

| Rank | Model <sup>a</sup>           | Converged? | AICc    | Δi    | Best Model <sup>b</sup> |
|------|------------------------------|------------|---------|-------|-------------------------|
| 1    | (1 Classroom)                | Yes        | 5329.60 | 0     | *                       |
| 2    | (1 Classroom) + (1 Semester) | No         | 5331.60 | 2.01  |                         |
| 3    | (1 Semester)                 | Yes        | 5375.92 | 46.32 |                         |
| 4    | No Random Effects            | Yes        | 5376.07 | 46.47 |                         |

<sup>a</sup> Although not shown, models include all fixed effects of interest: ACT + Fem.Inst + Fem.Stud + Fem.Inst\*Fem.Stud

**Table S8. Selection of fixed effects to predict student performance (course grade z-scores).**

| Rank | Model <sup>a</sup>                            | AICc   | Δi  | ω <sub>i</sub> | Best Model <sup>b</sup> |
|------|-----------------------------------------------|--------|-----|----------------|-------------------------|
| 1    | ACT + Fem.Inst*Fem.Stud                       | 5316.7 | 0   | 0.237          | *                       |
| 2    | ACT + Fem.Stud + Fem.Inst*Fem.Stud            | 5316.7 | 0   | 0.237          |                         |
| 3    | ACT + Fem.Inst + Fem.Inst*Fem.Stud            | 5316.7 | 0   | 0.237          |                         |
| 4    | ACT + Fem.Inst + Fem.Stud + Fem.Inst*Fem.Stud | 5316.7 | 0   | 0.237          |                         |
| 5    | ACT + Fem.Stud                                | 5321.6 | 4.9 | 0.020          |                         |
| 6    | ACT + Fem.Inst + Fem.Stud                     | 5322.0 | 5.3 | 0.017          |                         |
| 7    | ACT                                           | 5323.5 | 6.9 | 0.008          |                         |
| 8    | ACT + Fem.Inst                                | 5324.0 | 7.3 | 0.006          |                         |

<sup>a</sup> ACT = ACT score, Fem.Inst = Female Instructor, Fem.Stud = Female Student, Fem.Inst\*Fem.Stud = Interaction between instructor gender and student gender. Only models with Δi < 10 are shown (in fact, the next best model has a Δi = 164).

Although not shown, all models also include a random effect to allow for a random intercept for each class: (1|Classroom).

<sup>b</sup> As described in Methods, if models were within 2 AICc, the model with the fewest number of parameters was chosen as the best model.
